# Supplementary material for: A Robust and Versatile Method of Combinatorial Chemical Synthesis of Gene Libraries via Hierarchical Assembly of Partially Randomized Modules
Source: PubMed Central journal article supplement (PMC4565649; doi:10.1371/journal.pone.0136778), 2015-09-10
Supplement: pone.0136778.s001.pdf [file pone.0136778.s001.pdf]

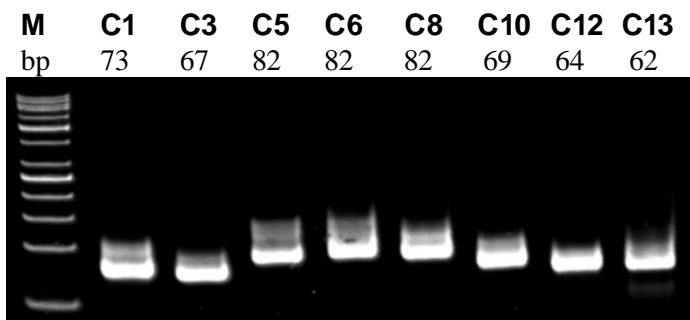

**S1 Fig. PAGE analysis of Klenow fill-in products.** 15 pmol of each randomized double stranded fragment were applied on a 10% PAGE for evaluation of the integrity of the elongation products; M=50 bp ladder (Invitrogen).
