# Supplementary material for: A Robust and Versatile Method of Combinatorial Chemical Synthesis of Gene Libraries via Hierarchical Assembly of Partially Randomized Modules
Source: PubMed Central journal article supplement (PMC4565649; doi:10.1371/journal.pone.0136778), 2015-09-10
Supplement: pone.0136778.s002.pdf [file pone.0136778.s002.pdf]

**S1 Table. Amino acid substitutions in 48 clones, examined for accumulation of soluble HisF protein.**

**High level of accumulation of soluble protein**

| Clone           | Substitutions | $\Delta 3$ | A 8 | D 11       | L 50 | I 52 | A 54 | S 55       | S 101 | N 103 | T 104 | A 105 | A 128 | D 130 | S 144      | T 171 | I 173 | D 176 | G 177 | K 179 | S 201 | A 204      | L 222 | A 223 | A 224 | S 225      |   |
|-----------------|---------------|------------|-----|------------|------|------|------|------------|-------|-------|-------|-------|-------|-------|------------|-------|-------|-------|-------|-------|-------|------------|-------|-------|-------|------------|---|
| 1               | 1             | 1          |     |            |      |      |      |            |       |       |       |       |       |       |            |       |       |       |       |       |       | $\Delta 3$ |       | K     |       |            |   |
| 2               | 8             | 0          |     |            | G    |      | Y    | D          |       |       |       |       | E     |       | Q          |       | Y     |       | S     |       |       |            |       |       |       |            | T |
| 3 <sup>a</sup>  | 6             | 2          |     |            |      |      |      | K          |       |       |       |       |       | F     | $\Delta 3$ |       | E     |       | H     |       | Y     |            |       |       | T     | $\Delta 3$ |   |
| 4               | 8             | 0          | K   |            |      |      | L    |            |       | D     | K     |       |       |       |            |       | F     |       |       |       |       | K          | S     |       |       | K          |   |
| 5 <sup>b</sup>  | 8             | 0          |     |            | T    |      | E    | D          |       |       |       |       |       |       |            | D     | G     | E     |       |       |       | P          |       |       | K     |            |   |
| 6               | 5             | 1          |     |            |      |      | H    | R          |       |       |       |       |       |       |            |       |       | K     | D     |       |       |            |       |       |       | $\Delta 3$ | N |
| 9               | 4             | 0          | D   |            |      |      |      |            |       |       |       |       |       |       |            |       |       |       |       |       |       | A          | H     |       |       |            | I |
| 10              | 4             | 0          |     |            |      |      | H    |            |       |       |       |       |       |       |            |       |       | A     |       |       |       | N          |       |       | I     |            |   |
| 11              | 4             | 0          |     |            |      |      |      | Q          |       |       |       |       |       | V     |            |       |       | G     |       |       |       |            |       | E     |       |            |   |
| 13              | 8             | 0          |     |            |      |      |      | K          |       | D     | K     |       |       | S     | K          |       |       |       |       |       |       | Y          |       |       | T     | D          |   |
| 14              | 8             | 0          | K   | Q          |      |      | G    | N          |       |       |       |       |       |       |            |       |       |       | Q     |       |       |            | H     | T     |       | M          |   |
| 15              | 8             | 0          |     |            |      |      |      | Q          |       |       |       |       | K     |       |            |       |       | I     | L     |       |       | Y          | H     |       | T     |            | K |
| 16              | 8             | 0          |     |            |      |      |      | T          | F     |       |       |       | E     | K     |            |       | D     |       | R     |       |       |            | T     |       | K     |            |   |
| 17 <sup>c</sup> | 4             | 0          |     |            |      |      |      |            |       |       | W     |       |       | E     |            |       |       | A     |       |       |       |            |       |       |       | K          |   |
| 18              | 5             | 0          |     |            |      |      |      |            |       |       | W     |       |       |       |            |       |       |       | V     | E     |       |            | K     |       | T     |            |   |
| 19              | 9             | 0          |     | V          |      | A    | G    |            |       | D     | K     |       |       |       |            | E     | Y     |       |       |       |       | H          |       |       |       | K          |   |
| 21              | 5             | 0          | M   | H          |      |      | D    |            |       |       |       |       |       |       |            |       | D     |       |       |       |       |            |       |       |       |            | D |
| 22              | 6             | 0          |     |            | P    |      |      |            |       |       | K     |       |       |       |            | T     |       | E     | E     |       |       |            |       |       |       |            | T |
| 23              | 9             | 0          |     |            |      |      | E    | H          |       | D     | K     |       |       |       |            |       |       |       | D     |       |       |            | M     |       | M     | H          | K |
| 24              | 3             | 0          |     |            |      |      |      | K          |       |       |       |       |       | E     |            |       |       |       |       |       |       |            |       |       | K     |            |   |
| 26              | 5             | 0          |     |            |      |      |      | Q          |       |       |       |       |       |       |            |       | Y     |       |       |       |       | T          |       |       | Q     |            | G |
| 27              | 10            | 0          | N   |            | M    |      | N    | E          |       |       | K     |       |       | R     |            | Y     |       |       |       |       |       | T          |       |       | D     |            | D |
| 28              | 7             | 0          |     |            |      |      |      |            |       |       |       |       | E     |       |            |       | N     |       | G     |       | D     | Q          |       | N     |       | K          |   |
| 29 <sup>d</sup> | 5             | 0          |     |            |      | D    | H    |            |       |       |       |       |       |       |            |       |       | Q     |       |       |       |            |       |       | K     | M          |   |
| 30              | 7             | 0          |     |            |      |      | K    |            |       | H     | R     |       |       |       |            |       | E     |       | E     | H     |       |            |       |       |       |            | I |
| 31              | 5             | 0          |     |            |      |      |      | K          |       |       | P     |       |       |       |            |       |       |       |       |       |       |            | V     | H     |       | K          |   |
| 32              | 2             | 0          |     |            |      |      | Q    | E          |       |       |       |       |       |       |            |       |       |       |       |       |       |            |       |       |       |            |   |
| 33              | 3             | 1          |     |            |      |      |      | F          |       | E     |       |       |       |       | $\Delta 3$ |       |       |       |       |       |       |            | Y     |       |       |            |   |
| 34              | 10            | 0          |     | N          |      | A    | G    |            |       | D     | K     |       |       |       | N          | K     | A     |       |       |       |       |            |       | Q     |       |            | I |
| 35              | 6             | 0          |     |            |      |      | D    |            |       |       |       |       | E     | R     |            |       |       |       | V     |       |       |            |       |       | Y     |            | K |
| 36              | 6             | 1          | F   | E          |      |      |      |            |       |       |       |       |       |       | $\Delta 3$ |       |       | Y     |       |       |       |            |       | E     | E     |            | G |
| 37              | 9             | 0          | Y   |            |      |      | Q    | E          |       |       |       |       | E     | A     |            | S     |       |       | Q     |       |       |            |       |       | E     | N          |   |
| 38              | 7             | 0          |     |            |      |      | K    |            |       |       |       |       |       |       | R          | D     | V     |       |       |       |       |            | H     |       | M     | L          |   |
| 39              | 5             | 0          | H   |            |      |      | L    |            |       |       |       |       |       |       |            |       | F     |       |       |       |       |            | H     |       |       |            | I |
| 40              | 5             | 0          |     | S          |      |      | K    |            |       |       |       |       |       |       |            |       | L     |       |       |       |       |            | R     |       |       |            | T |
| 41              | 8             | 0          |     | R          |      |      |      |            |       | D     | K     |       |       |       |            |       | E     | E     |       |       |       | Y          |       |       | K     | H          |   |
| 42              | 4             | 1          |     |            |      |      |      | $\Delta 3$ |       |       |       |       | D     |       |            |       |       |       |       |       |       |            | A     |       |       | N          | N |
| 43 <sup>e</sup> | 9             | 0          |     |            |      |      | Y    | G          |       | L     | G     |       |       |       |            |       | Y     |       | E     | F     |       |            |       |       | K     | K          |   |
| 44              | 7             | 0          |     |            |      |      | V    |            |       | D     | K     |       |       |       |            |       |       |       |       |       |       | N          | H     | D     |       | N          |   |
| 45              | 5             | 1          |     |            |      |      | L    |            |       | K     |       |       |       |       | $\Delta 3$ |       |       |       |       |       |       | Y          | E     |       |       |            | T |
| 46              | 3             | 1          | V   | $\Delta 3$ |      |      | D    |            |       |       |       |       |       |       |            |       |       |       |       |       |       |            |       |       |       |            | R |
| 47              | 6             | 0          |     | Y          |      |      |      |            |       |       |       |       |       |       |            |       | E     |       |       |       |       | E          |       | T     | T     |            | T |
| 48              | 9             | 0          |     | S          | Q    |      |      |            |       |       |       |       |       | A     | Q          |       |       |       | S     | Y     |       | K          | H     | E     |       |            |   |

**Low level of accumulation of soluble protein**

| Clone | Substitutions | $\Delta 3$ | A8         | D11        | L50 | I52 | A54 | S55 | S101 | N103 | T104 | A105 | A128 | D130 | S144 | T171 | I173 | D176 | G177       | K179 | S201 | A204 | L222 | A223 | A224 | S225 |  |
|-------|---------------|------------|------------|------------|-----|-----|-----|-----|------|------|------|------|------|------|------|------|------|------|------------|------|------|------|------|------|------|------|--|
| 7     | 7             | 1          | V          |            |     |     | D   | F   |      | Y    |      | D    |      |      |      |      |      | E    | $\Delta 3$ |      |      |      | D    |      |      |      |  |
| 8     | 9             | 1          | $\Delta 3$ |            | E   | K   |     | E   |      |      |      |      | K    |      | V    |      |      |      | K          |      | H    |      |      |      | K    | M    |  |
| 12'   | 7             | 0          |            |            | T   |     |     |     |      |      |      |      | E    | R    |      |      |      |      | Y          |      | R    | H    |      |      | K    |      |  |
| 20    | 10            | 1          | D          | $\Delta 3$ | M   |     | N   | E   |      |      | W    |      |      |      |      |      |      |      | Q          |      |      | Y    | D    | H    | E    |      |  |
| 25    | 9             | 0          |            |            | M   |     | Q   | E   |      |      |      |      |      |      | G    |      | N    | I    | D          |      | K    |      |      |      | K    |      |  |

a: GTT/ATT (V56I); b: GAG/GTG (E57V); c: AAG/ATG (K13M); d: GAG/AAG (E161K), GGA/AGA (G166R); e: GTT/ATT (V56I), GCT-TCT (A218S); f: GCG/GGG (A221G)
